# Supplementary material for: Electrocardiographic Characteristics of Ventricular Arrhythmia Originating from the Left Coronary Cusp
Source: Hindawi journal article supplement (doi:10.1155/2011/935951), 2011-01-01
Supplement: f1 [file 935951.f1.pdf]

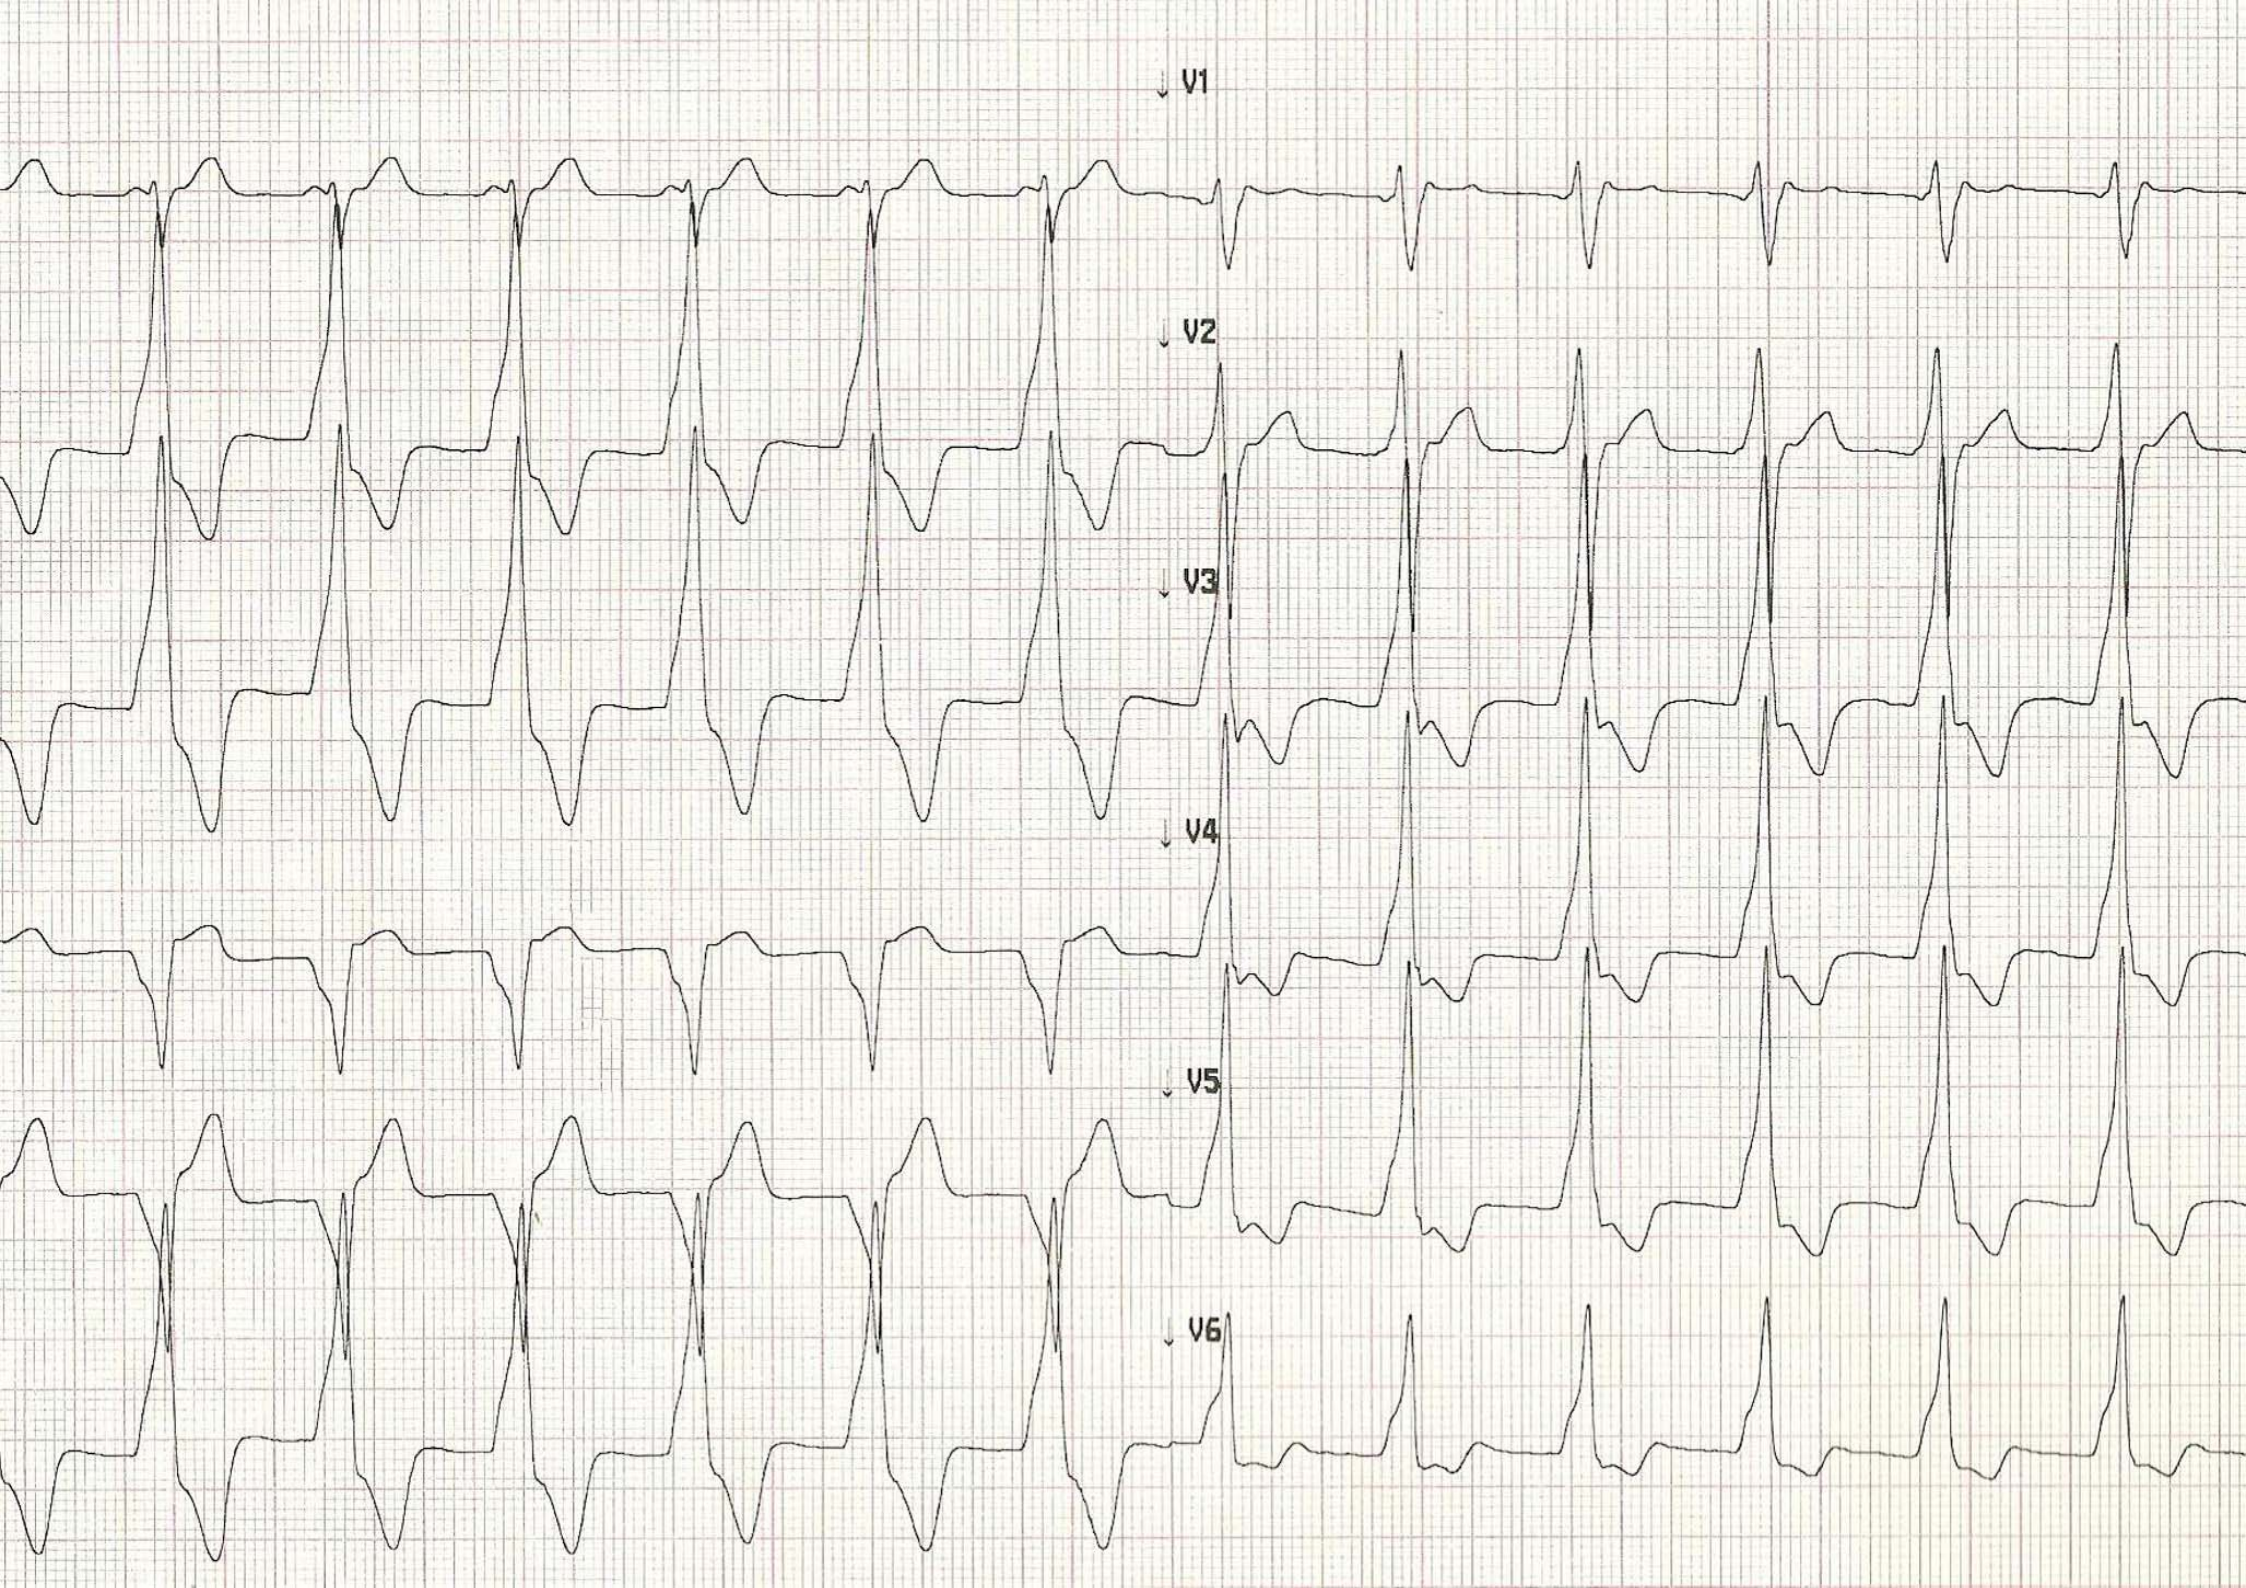

↓ V1

↓ V2

↓ V3

↓ V4

↓ V5

↓ V6
