# Supplementary material for: Electrocardiographic Characteristics of Ventricular Arrhythmia Originating from the Left Coronary Cusp
Source: Hindawi journal article supplement (doi:10.1155/2011/935951), 2011-01-01

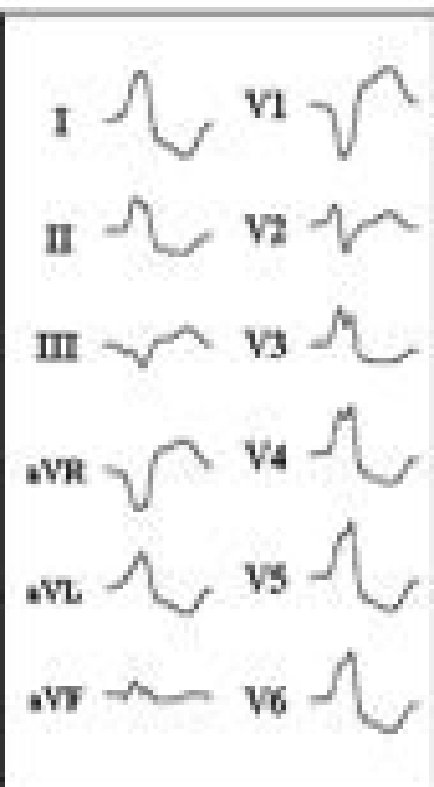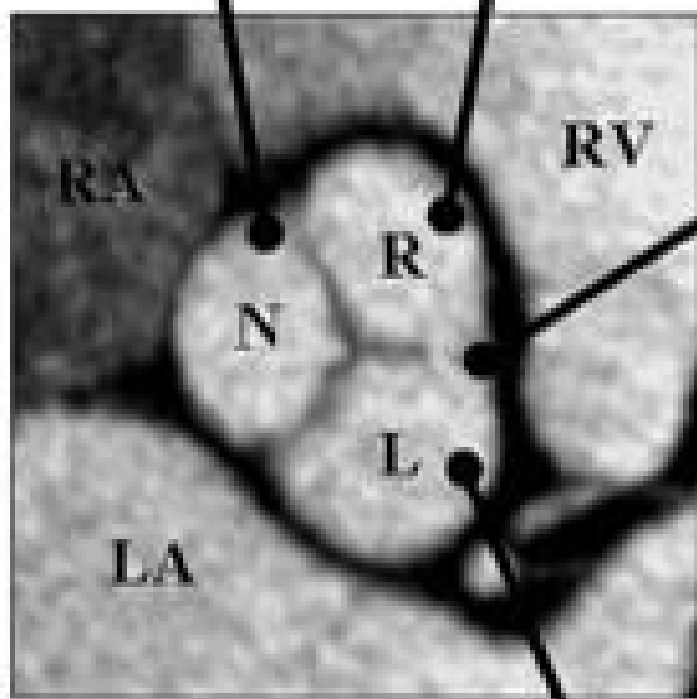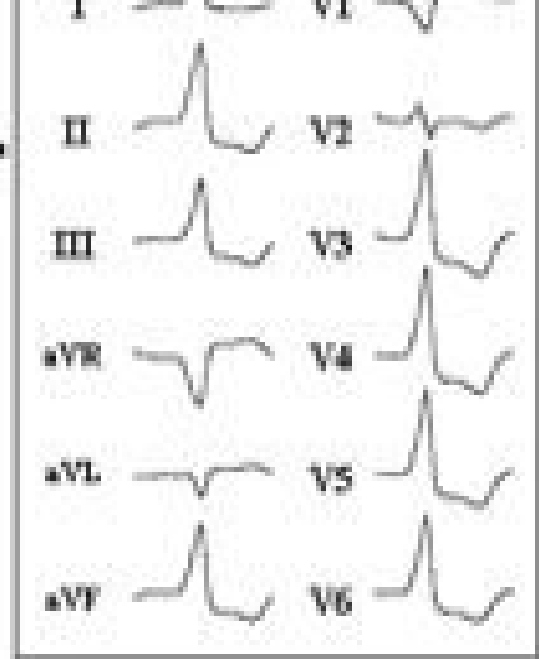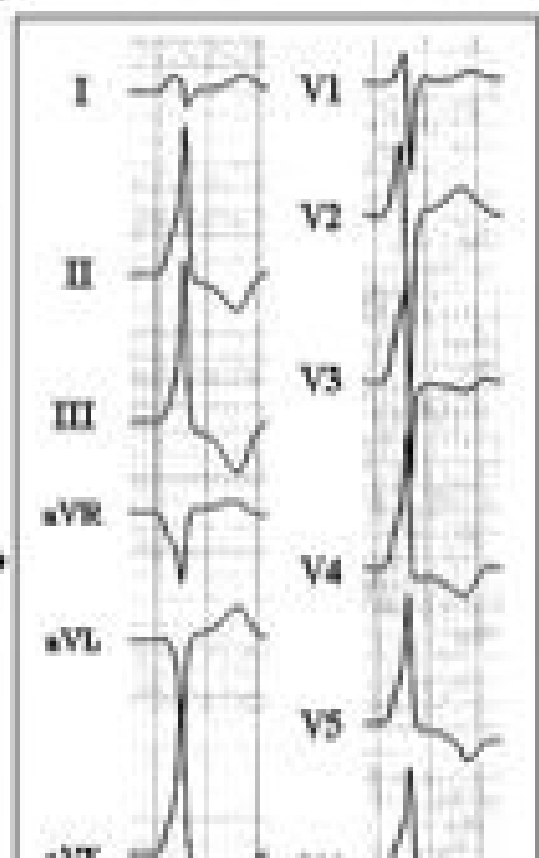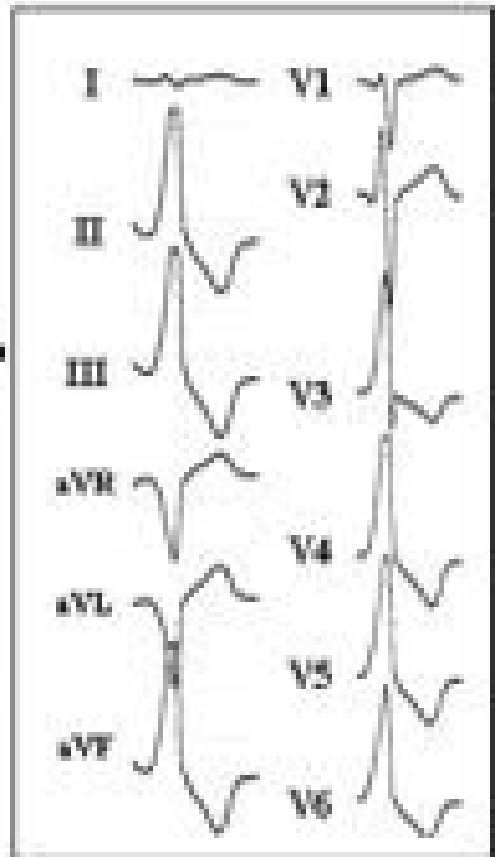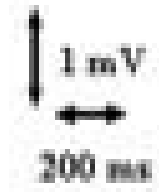

Supplement: f2 [file 935951.f2.pdf]
